# Supplementary material for: Changes in circulating forms of anti-Muüllerian hormone and androgens in women with and without PCOS: a systematic longitudinal study throughout pregnancy
Source: PubMed Central journal article supplement — Hum Reprod. 2023 Mar 15;38(5):938–50. doi: 10.1093/humrep/dead050 (PMC10152173; doi:10.1093/humrep/dead050), 2023-03-15
Supplement: dead050_supplementary_table_si.pdf [file dead050_supplementary_table_si.pdf]

**human reproduction** **SUPPLEMENTARY DATA**

**Supplementary Table S1** Description of interassay coefficient of variation (CV), limit of quantification, and reference range of each assay.

|                    | <b>Interassay CV (%)</b> | <b>Limit of quantification</b> | <b>Reference range in young control women in the follicular phase</b> |
|--------------------|--------------------------|--------------------------------|-----------------------------------------------------------------------|
| Total AMH          | 4.8–5.7                  | 0.47 pmol/l                    | 11–30.3 pmol/l                                                        |
| LH                 | 2.3–4.4                  | 0.03 UI/l                      | 2.0–7.6 UI/l                                                          |
| FSH                | 3.2–4.6                  | 0.03 UI/l                      | 4.3–9.0 UI/l                                                          |
| Estradiol          | 2.3–6.7                  | 14 pg/ml                       | 21–251 pg/ml                                                          |
| Total testosterone | 6.3                      | 0.05 ng/ml                     | 0.13–0.53 ng/ml                                                       |
| Androstenedione    | 4.5–6.6                  | 0.023 ng/ml                    | 0.52–1.98 ng/ml                                                       |
| DHEAS              | 4.5–6.6                  | 0.16 mmol/l                    | 0.49–10.6 mmol/l                                                      |
| 17-OH Progesterone | 9.8                      | 0.04 ng/ml                     | 0.12–1.65 ng/ml                                                       |
| Insulin            | 1.9–4.5                  | 2 mUI/l                        | <11 mUI/l                                                             |
| SHBG               | 5.3                      | 1 nmol/l                       | 18.2–135.5 nmol/l                                                     |

AMH: anti-Müllerian hormone; SHBG: sex hormone-binding globulin; DHEAS: dehydroepiandrosterone sulfate.
