# Supplementary material for: Changes in circulating forms of anti-Muüllerian hormone and androgens in women with and without PCOS: a systematic longitudinal study throughout pregnancy
Source: PubMed Central journal article supplement — Hum Reprod. 2023 Mar 15;38(5):938–50. doi: 10.1093/humrep/dead050 (PMC10152173; doi:10.1093/humrep/dead050), 2023-03-15
Supplement: dead050_supplementary_table_sii.pdf [file dead050_supplementary_table_sii.pdf]

**Supplementary Table SII Description of patients (PCOS and controls) according to fetal sex.**

|                           | Boy    |                             |    |                           | Girl   |                             |   |                         |
|---------------------------|--------|-----------------------------|----|---------------------------|--------|-----------------------------|---|-------------------------|
|                           | N = 35 |                             |    |                           | N = 21 |                             |   |                         |
|                           | N      | PCOS<br>N = 16              | N  | Control<br>N = 19         | N      | PCOS<br>N = 12              | N | Control<br>N = 9        |
| First trimester (T1)      |        |                             |    |                           |        |                             |   |                         |
| Weight gain (kg)          | 15     | 0.0 (−2.0 to 2.0)           | 19 | 1.0 (0.0 to 3.0)          | 12     | 1.5 (0.0 to 2.5)            | 9 | 2.0 (1.0 to 3.0)        |
| BMI (kg/m <sup>2</sup> )  | 16     | 26.0 (22.8 to 29.3)         | 19 | 30.4 (22.2 to 33.1)       | 12     | 23.8 (20.6 to 27.2)         | 9 | 23.2 (20.4 to 27.1)     |
| AMH (pmol/l)              | 15     | 44.4 (28.8 to 57.6)         | 19 | 17.2 (9.0 to 20.4)        | 12     | 33.3 (26.2 to 47.8)         | 9 | 11.8 (10.6 to 14.0)     |
| Cleaved AMH (pmol/l)      | 13     | 29.2 (18.4 to 34.4)         | 19 | 9.8 (5.6 to 14.0)         | 11     | 20.6 (16.0 to 31.0)         | 9 | 7.8 (6.8 to 8.8)        |
| TT (ng/ml)                | 15     | 0.83 (0.69 to 1.19)         | 19 | 0.55 (0.46 to 0.93)       | 12     | 0.76 (0.67 to 0.91)         | 9 | 0.59 (0.41 to 0.86)     |
| Albumine (g/l)            | 13     | 41.0 (39.0 to 43.0)         | 13 | 39.0 (38.0 to 40.0)       | 10     | 41.5 (40.0 to 42.0)         | 9 | 40.0 (38.0 to 40.0)     |
| SHBG (nmol/l)             | 13     | 178.1 (124.3 to 207.7)      | 19 | 210.9 (138.8 to 249.2)    | 10     | 222.9 (187.2 to 244.5)      | 9 | 247.7 (198.6 to 292.6)  |
| DHEAS (μmol/l)            | 13     | 4.5 (3.3 to 6.8)            | 19 | 4.3 (2.7 to 6.4)          | 10     | 3.9 (3.2 to 4.9)            | 9 | 4.1 (3.6 to 6.3)        |
| Androstenedione (ng/ml)   | 14     | 2.3 (1.5 to 3.3)            | 18 | 1.4 (1.2 to 2.1)          | 12     | 2.9 (1.6 to 3.1)            | 9 | 1.9 (1.4 to 2.4)        |
| Estradiol (pg/ml)         | 15     | 1496.0 (968.0 to 2677.0)    | 19 | 1370.0 (827.0 to 1955.0)  | 12     | 1694.0 (916.0 to 2007.0)    | 9 | 1357.0 (935 to 2892)    |
| LH (UI/l)                 | 15     | 0.7 (0.6 to 0.8)            | 19 | 0.4 (0.3 to 0.6)          | 12     | 0.7 (0.5 to 0.9)            | 9 | 0.5 (0.4 to 0.8)        |
| Non measurable LH (yes/%) | 15     | 0 (0.0)                     | 19 | 1 (5.3)                   | 12     | 1 (8.3)                     | 9 | 0 (0.0)                 |
| Fasting glycemia (g/l)    | 14     | 0.8 (0.8 to 0.9)            | 19 | 0.8 (0.7 to 0.9)          | 7      | 0.8 (0.7 to 0.8)            | 8 | 0.8 (0.8 to 0.8)        |
| Second trimester (T2)     |        |                             |    |                           |        |                             |   |                         |
| Weight gain (kg)          | 15     | 5.5 (3.0 to 6.0)            | 17 | 5.0 (2.0 to 8.0)          | 12     | 5.3 (2.0 to 6.5)            | 8 | 7.0 (4.8 to 9.0)        |
| BMI (kg/m <sup>2</sup> )  | 15     | 28.0 (25.5 to 31.2)         | 17 | 30.5 (24.8 to 33.3)       | 12     | 24.7 (22.3 to 28.3)         | 8 | 23.9 (22.2 to 30.6)     |
| AMH (pmol/l)              | 15     | 28.2 (14.6 to 40.2)         | 18 | 11.2 (6.0 to 15.6)        | 12     | 29.0 (16.6 to 35.8)         | 9 | 8.8 (8.6 to 12.4)       |
| Cleaved AMH (pmol/l)      | 15     | 18.4 (9.2 to 27.6)          | 18 | 7.3 (3.8 to 9.0)          | 12     | 18.8 (10.5 to 22.2)         | 9 | 5.8 (5.0 to 6.6)        |
| TT (ng/ml)                | 15     | 1.13 (0.78 to 1.36)         | 18 | 0.62 (0.46 to 0.79)       | 12     | 0.60 (0.57 to 0.80)         | 9 | 0.58 (0.43 to 0.62)     |
| Albumine (g/l)            | 15     | 34.0 (33.0 to 35.0)         | 18 | 34.0 (32.0 to 35.0)       | 12     | 34.5 (32.5 to 37.5)         | 9 | 35.0 (35.0 to 36.0)     |
| SHBG (nmol/l)             | 15     | 343.7 (291.9 to 459.9)      | 18 | 396.4 (329.7 to 427.6)    | 12     | 443.0 (339.8 to 495.8)      | 9 | 424.6 (359.3 to 468.4)  |
| DHEAS (μmol/l)            | 15     | 4.6 (2.5 to 5.2)            | 18 | 3.0 (1.7 to 4.2)          | 12     | 2.8 (2.0 to 3.6)            | 9 | 2.7 (2.6 to 3.7)        |
| Androstenedione (ng/ml)   | 15     | 2.4 (2.0 to 2.9)            | 18 | 1.5 (0.9 to 2.1)          | 12     | 1.8 (1.3 to 2.6)            | 9 | 1.3 (1.0 to 1.7)        |
| Estradiol (pg/ml)         | 15     | 8388.0 (6850.0 to 10 723.0) | 18 | 7388.0 (5407.0 to 9178.0) | 12     | 7096.0 (5286.0 to 10 986.0) | 9 | 8068.0 (4672 to 14 333) |
| LH (UI/l)                 | 16     | 0.0 (0.0 to 0.1)            | 18 | 0.0 (0.0 to 0.0)          | 12     | 0.0 (0.0 to 0.3)            | 9 | 0.0 (0.0 to 0.0)        |
| Non measurable LH (yes/%) | 16     | 11 (68.8)                   | 19 | 16 (84.2)                 | 12     | 7 (58.3)                    | 9 | 7 (77.8)                |
| Third trimester (T3)      |        |                             |    |                           |        |                             |   |                         |
| Weight gain (kg)          | 15     | 9.0 (4.0 to 11.5)           | 19 | 11.0 (4.0 to 15.0)        | 11     | 8.0 (7.0 to 13.0)           | 8 | 10.8 (7.5 to 14.0)      |
| BMI (kg/m <sup>2</sup> )  | 15     | 29.1 (26.9 to 32.4)         | 19 | 32.6 (26.8 to 36.7)       | 11     | 27.4 (22.8 to 32.0)         | 8 | 25.6 (23.8 to 31.4)     |

(continued)

**Supplementary Table SII Continued**

|                           | Boy    |                                 |    |                               | Girl   |                                 |   |                           |
|---------------------------|--------|---------------------------------|----|-------------------------------|--------|---------------------------------|---|---------------------------|
|                           | N = 35 |                                 |    |                               | N = 21 |                                 |   |                           |
|                           | N      | PCOS<br>N = 16                  | N  | Control<br>N = 19             | N      | PCOS<br>N = 12                  | N | Control<br>N = 9          |
| AMH (pmol/l)              | 14     | 19.3 (8.2 to 28.2)              | 18 | 6.4 (5.0 to 10.0)             | 12     | 15.1 (9.9 to 24.4)              | 8 | 5.4 (4.4 to 6.4)          |
| Cleaved AMH (pmol/l)      | 13     | 12.4 (4.8 to 18.2)              | 18 | 4.3 (3.4 to 6.8)              | 12     | 9.0 (6.3 to 17.2)               | 9 | 3.6 (2.8 to 3.8)          |
| TT (ng/ml)                | 14     | 1.20 (1.02 to 1.48)             | 18 | 0.63 (0.48 to 0.91)           | 12     | 0.68 (0.58 to 0.80)             | 9 | 0.52 (0.46 to 0.64)       |
| Albumine (g/l)            | 12     | 32.0 (30.5 to 33.0)             | 17 | 31.0 (30.0 to 33.0)           | 11     | 32.0 (31.0 to 34.0)             | 8 | 33.0 (32.5 to 33.0)       |
| SHBG (nmol/l)             | 13     | 472.3 (374.0 to 512.7)          | 17 | 497.2 (400.5 to 573.0)        | 12     | 467.5 (364.2 to 607.3)          | 8 | 449.3 (372.2 to 509.1)    |
| DHEAS (μmol/l)            | 13     | 2.7 (2.5 to 4.6)                | 17 | 1.9 (1.3 to 2.7)              | 12     | 2.1 (1.6 to 2.7)                | 8 | 2.4 (2.0 to 2.8)          |
| Androstenedione (ng/ml)   | 13     | 2.3 (2.1 to 4.9)                | 18 | 1.5 (1.0 to 2.1)              | 12     | 1.7 (1.4 to 2.6)                | 9 | 1.1 (1.0 to 1.3)          |
| Estradiol (pg/ml)         | 14     | 16 696.0 (13 580.0 to 22 395.0) | 18 | 15 970.0 (9711.0 to 19 438.0) | 12     | 16 138.0 (11 688.0 to 17 002.0) | 9 | 15 270 (11 181 to 19 213) |
| LH (UI/l)                 | 15     | 0.0 (0.0 to 0.2)                | 18 | 0.0 (0.0 to 0.0)              | 12     | 0.0 (0.0 to 0.5)                | 9 | 0.1 (0.0 to 0.2)          |
| Non measurable LH (yes/%) | 15     | 9 (60.0)                        | 18 | 14 (77.8)                     | 12     | 7 (58.3)                        | 9 | 4 (44.4)                  |

Values are presented as n (percentage) or as median (IQR). IQR: interquartile range; N: number of available observations, T0: before pregnancy; T1: first trimester of pregnancy; T2: second trimester of pregnancy; T3: third trimester of pregnancy; AMH: anti-Müllerian hormone; PCOS: polycystic ovary syndrome; Cleaved AMH: (total AMH – proAMH Measurement); SHBG: sex hormone-binding globulin; DHEAS: dehydroepiandrosterone sulfate.
